# Supplementary material for: Blending muddiest point activities with the common formative assessments bolsters the performance of marginalized student populations in general chemistry
Source: Royal Society of Chemistry journal article supplement (doi:10.1039/d1rp00314c), 2022-01-01
Supplement: d1rp00314c1.pdf [file d1rp00314c1.pdf]

## Appendix

### A screenshot of the muddiest point prompt for Chapter 3 and examples of students' responses

Write the most confusing concept from Chapter 3.

NOTE: In Chapter 3, we discussed the Naming of ionic and molecular compounds, Mole concept of Compounds (determining moles, mass, and molecules of compounds), determining mass percent composition of elements in a compound, determining empirical and molecular formulas of compounds.

The image shows three separate student response boxes, each with a grey border. Each box contains a user profile icon, the name 'Hidden', a text response, and a row of interaction icons (comments and likes).

**Response 1:**  
User: Hidden  
Text: Determining the empirical and molecular formulas  
Comments: 0, Likes: 3

**Response 2:**  
User: Hidden  
Text: mass % composition of elements in compound  
Comments: 0, Likes: 5

**Response 3:**  
User: Hidden  
Text: Determining mass percent compositions of a compound  
Comments: 0, Likes: 4

Table 1 Muddiest points reported by the participants from each chapter

| Chapter                                                                                      | Muddiest Point Concept                  | Specific Muddiest Points                                      | N                    | % Responses |
|----------------------------------------------------------------------------------------------|-----------------------------------------|---------------------------------------------------------------|----------------------|-------------|
| Chapter 1-<br>Matter, units<br>and<br>Measurements,<br>Dimensional<br>Analysis               | Dimensional<br>analysis                 | Unit conversions                                              | 125                  | 40.3        |
|                                                                                              |                                         | Exponents                                                     | 4                    | 1.3         |
|                                                                                              | Significant figures                     | Applying sig figs rules in multistep calculations.            | 116                  | 37.4        |
|                                                                                              |                                         | Scientific notation                                           | 12                   | 3.9         |
|                                                                                              |                                         | Matter                                                        | Properties of matter | 10          |
|                                                                                              | Prefixes<br>Others                      | Mixtures                                                      | 8                    | 2.6         |
|                                                                                              |                                         | Compound/element                                              | 4                    | 1.3         |
|                                                                                              |                                         | -                                                             | 16                   | 5.2         |
|                                                                                              |                                         | Mass, volume, temperature, density, etc.                      | 17                   | 5.4         |
| Chapter 2-<br>Ions, Periodic<br>Table, Atomic<br>Mass                                        | Mass and mole<br>concept<br>conversions | Converting between mass and moles                             | 122                  | 39.0        |
|                                                                                              |                                         | Number of moles and number of atoms                           | 102                  | 32.6        |
|                                                                                              | Atomic Mass                             | Calculating atomic mass of isotopes                           | 52                   | 16.6        |
|                                                                                              | Subatomic<br>Particles                  | Ions: Losing and gaining electrons                            | 26                   | 8.3         |
|                                                                                              | Others                                  | Law of conservation of mass, law of definite proportions e.tc | 11                   | 3.5         |
| Chapter 3-<br>Naming of ionic<br>and molecular<br>compounds,<br>Mole concept of<br>Compounds | The mole concept                        | Converting to moles/ mass                                     | 98                   | 23.4        |
|                                                                                              |                                         | Determination of empirical formula and molecular formula      | 85                   | 20.3        |
|                                                                                              | Mass composition<br>Compounds           | Molecular formula                                             | 55                   | 13.1        |
|                                                                                              |                                         | Calculating mass % composition                                | 78                   | 18.6        |
|                                                                                              |                                         | Naming compounds                                              | 51                   | 12.2        |
|                                                                                              | Polyatomic ions<br>Others               | Naming the compounds with transition metals                   | 5                    | 1.2         |
|                                                                                              |                                         | Determining molecules of compounds                            | 3                    | 0.7         |
|                                                                                              |                                         | Naming polyatomic ions                                        | 20                   | 4.8         |
|                                                                                              |                                         | Acid naming rules, charges, and cations                       | 24                   | 5.7         |

Table 1—Continued

| Chapter                                                                           | Muddiest Point Concept                                              | Specific Muddiest Points                                                              | N                                                                            | % Responses |      |
|-----------------------------------------------------------------------------------|---------------------------------------------------------------------|---------------------------------------------------------------------------------------|------------------------------------------------------------------------------|-------------|------|
| Chapter 4-<br>Balancing<br>Chemical<br>Reactions and<br>Stoichiometry<br>Reaction | Naming<br>compounds/ Ions<br>in a compound                          | Naming compounds: covalent<br>compounds, oxyacids and/or writing<br>chemical formulas | 117                                                                          | 38.0        |      |
|                                                                                   |                                                                     | Calculations                                                                          | Theoretical yield                                                            | 65          | 21.1 |
|                                                                                   | Percent yield                                                       |                                                                                       | 41                                                                           | 13.3        |      |
|                                                                                   | Actual yield                                                        |                                                                                       | 4                                                                            | 1.3         |      |
|                                                                                   | Chemical<br>reactions                                               | Stoichiometry                                                                         | 24                                                                           | 7.8         |      |
|                                                                                   |                                                                     | Balancing chemical reactions                                                          | 9                                                                            | 2.9         |      |
|                                                                                   |                                                                     | Products of a reaction                                                                | 5                                                                            | 1.6         |      |
|                                                                                   | Limiting reactant                                                   | Limiting reactant calculations                                                        | 14                                                                           | 4.5         |      |
|                                                                                   | Others                                                              | Chemical formulas, Polyatomic<br>compounds.                                           | 29                                                                           | 9.5         |      |
|                                                                                   | Chapter 5-<br>Introduction to<br>solutions and<br>aqueous reactions | Types of<br>reactions                                                                 | Redox reactions                                                              | 100         | 46.3 |
| Acid base reactions                                                               |                                                                     |                                                                                       | 34                                                                           | 15.7        |      |
| Precipitation reactions and solubility                                            |                                                                     |                                                                                       | 28                                                                           | 13          |      |
| Gas evolving reactions                                                            |                                                                     |                                                                                       | 22                                                                           | 10.2        |      |
| Solutions                                                                         |                                                                     | Concentration/molarity                                                                | 20                                                                           | 9.3         |      |
| Electrolytes                                                                      |                                                                     | Strong/weak electrolytes                                                              | 8                                                                            | 3.4         |      |
| Others                                                                            |                                                                     | Molecular/ Net ionic equations                                                        | 4                                                                            | 2.1         |      |
| Chapter 6-<br>Gases                                                               |                                                                     | Gases in a<br>chemical reaction                                                       | Stoichiometry & molar volume                                                 | 83          | 36.9 |
|                                                                                   | Gas Mixture calculations/partial<br>pressures                       |                                                                                       | 55                                                                           | 24.4        |      |
|                                                                                   | Diffusion &<br>Effusion of gases                                    | Rates of effusion and diffusion,<br>Graham's law                                      | 46                                                                           | 20.4        |      |
|                                                                                   |                                                                     | Application of<br>ideal gas law                                                       | Calculations involving ideal gas law:<br>Pressure, density, mass, molar mass | 37          | 16.4 |
|                                                                                   | Others                                                              | Intermolecular forces, mean square<br>velocity, Partial pressure.                     | 4                                                                            | 1.8         |      |
|                                                                                   | Chapter 7-<br>Thermochemistry                                       | Hesse's law                                                                           | Application of Hesse's law in<br>calculations                                | 65          | 28.0 |
|                                                                                   |                                                                     | Calculations                                                                          | Calculating enthalpies of reactions                                          | 58          | 25.0 |
| Quantifying<br>heat& work                                                         |                                                                     | Thermal transfer/work/heat<br>calculations                                            | 28                                                                           | 12.1        |      |
| Others                                                                            |                                                                     | Exchanging energy between system<br>and surrounding,                                  | 7                                                                            | 3.0         |      |

Table 1—Continued

| Chapter                                               | Muddiest Point Concept                        | Specific Muddiest Points                                                  | N   | % Responses |
|-------------------------------------------------------|-----------------------------------------------|---------------------------------------------------------------------------|-----|-------------|
| Chapter 8-<br>Quantum-<br>Mechanical<br>Model of Atom | Quantum numbers                               | n, l, m <sub>l</sub> , m <sub>s</sub>                                     | 120 | 40.8        |
|                                                       | Calculations                                  | Energy of a photon                                                        | 80  | 27.2        |
|                                                       |                                               | Calculations of wavelength given mass and speed                           | 52  | 17.7        |
|                                                       |                                               | Calculations of wavelength of light for a transition in the Hydrogen atom | 33  | 11.2        |
|                                                       | Electronic transition levels of hydrogen atom |                                                                           |     |             |
|                                                       | Others                                        | Orbitals (s, p, d, f)                                                     | 9   | 3.1         |
| Chapter 9-<br>Periodic<br>properties of<br>elements   | Orbitals                                      | Filling orbitals                                                          | 50  | 21.7        |
|                                                       | Electron affinity                             | Electron affinity                                                         | 50  | 21.7        |
|                                                       | Ionization energies                           | Determining ionization energies of atoms                                  | 45  | 19.6        |
|                                                       | Electron configuration                        | Electron configuration for ions                                           | 43  | 18.7        |
|                                                       | Valence electrons                             | Valence electrons for transition elements                                 | 16  | 7           |
|                                                       | Others                                        | Trends of atomic Radii, Charge of the Nucleus, Para magnetism, etc.       | 26  | 11.3        |
| Chapter 10-<br>Chemical<br>bonding/Lewis<br>model     | Resonance & formal charge                     | Drawing resonance structures and calculating formal charges               | 121 | 37.8        |
|                                                       | Dot diagrams                                  | Drawing Lewis structures of atoms                                         | 106 | 33.1        |
|                                                       | Polarity                                      | Determining polarity of molecules                                         | 70  | 21.9        |
|                                                       | Bond energies & bond lengths                  | Bond energy calculations                                                  | 13  | 4.1         |
|                                                       | Others                                        | Estimating enthalpy change of a reaction from bond energies               | 10  | 3.1         |

Table 2 Exam item number and assessed concepts in the three Midterm Exams and the Final Exam

| <b>Exam 1</b>          |                                                                                                                      |
|------------------------|----------------------------------------------------------------------------------------------------------------------|
| <b>Exam Items</b>      | <b>Assessed Concepts</b>                                                                                             |
| M-1,2                  | Classification of matter- pure substances and mixtures                                                               |
| M-3,4,5,9              | Properties of matter—physical change, separation of mixtures, chemical change, extensive versus intensive properties |
| M-6                    | Measurements—Precision and accuracy                                                                                  |
| M-7,8                  | Measurements—Significant figures                                                                                     |
| S-24                   |                                                                                                                      |
| M-10,11                | Dimensional analysis, Unit conversions, Derived Units—density & volume,                                              |
| S-25,26,27             | Significant figures                                                                                                  |
| M-12,17                | Laws explained by the Atomic Theory of conservation of mass                                                          |
| M-13,14,15, 6,18,19,20 | Periodic Table/Isotopes: Atom, elements, significant figures                                                         |
| S-23                   |                                                                                                                      |
| S-21,22, 28            | The mole concept, significant figures                                                                                |
| <b>Exam 2</b>          |                                                                                                                      |
| <b>Exam Items</b>      | <b>Exam Concepts</b>                                                                                                 |
| M-1,2                  | Bonding                                                                                                              |
| M-3,4,5,7              | Naming compounds                                                                                                     |
| M-6,8                  | Chemical formula of compounds                                                                                        |
| M-9,12                 | Empirical formula/molecular formula                                                                                  |
| S-26                   |                                                                                                                      |
| M-10,11                | Mass percent composition                                                                                             |
| M-13                   | Balancing chemical reactions                                                                                         |
| S-27                   |                                                                                                                      |
| M-14,15                | Chemical reactions, moles, stoichiometry                                                                             |
| M-16,17                | Theoretical yield, Percent yield, Actual yield, Limiting reactants                                                   |
| S-28                   |                                                                                                                      |
| M-18,21                | Reaction types                                                                                                       |
| M-19,22,23,24,25       | Solutions and molarity                                                                                               |
| S-29,30,31             |                                                                                                                      |
| <b>Exam 3</b>          |                                                                                                                      |
| <b>Exam Items</b>      | <b>Exam Concepts</b>                                                                                                 |
| M-1                    | Oxidation numbers                                                                                                    |
| M-2,3                  | Types of reactions                                                                                                   |
| M-4,5,6,7,9,           | Gas laws, Ideal gas law                                                                                              |
| 10,16,18               |                                                                                                                      |
| M-8                    | Grahams law of diffusion                                                                                             |
| M-11                   | Rates of effusion                                                                                                    |
| M-12                   | Exchanging heat between system and surrounding.                                                                      |
| M-13,14,15,            | Enthalpy changes                                                                                                     |
| 17,19,20,21            |                                                                                                                      |

Note: M and S denotes multiple-choice questions and short-answer questions, respectively.

Table 2—Continued

| <b>Final Exam</b> |                                                                                                                                        |
|-------------------|----------------------------------------------------------------------------------------------------------------------------------------|
| <b>Exam Items</b> | <b>Exam Concepts</b>                                                                                                                   |
| M-1               | Significant figures                                                                                                                    |
| M-2               | Dimensional analysis/Unit conversions                                                                                                  |
| M-3, 4            | Elements, Isotopes                                                                                                                     |
| M-7, 8            | Mole Concept, Stoichiometry: Limiting reactant, theoretical yield                                                                      |
| M-5               | Chemical formula of compounds                                                                                                          |
| M-6               | Empirical formula                                                                                                                      |
| M-9, 10           | Oxidation states and redox reactions                                                                                                   |
| M-11,12           | Gas laws                                                                                                                               |
| M-13,14           | Energy                                                                                                                                 |
| M-15,16,17, 18    | Quantum numbers and orbital                                                                                                            |
| M-19, 20          | Orbital diagrams, Paramagnetic/diamagnetic species                                                                                     |
| M-21              | Electron Configuration                                                                                                                 |
| M-22              | Trends of atomic Radii                                                                                                                 |
| M-23              | Ionization energy                                                                                                                      |
| M-24              | Electronegativity of elements                                                                                                          |
| M-25              | Polarity of molecules                                                                                                                  |
| M-26,27           | Bond energies                                                                                                                          |
| M-28,29,30        | Hybridization                                                                                                                          |
| S-31,32,33        | Valence Bond Theory: Lewis dot structures, valence electrons, resonance structures, electron and molecular geometry, and formal charge |
| S-34              | Stoichiometry: Titration calculations                                                                                                  |

Note: M and S denotes multiple-choice questions and short-answer questions, respectively.

Table 3 Reliability test results for Exam 1

| <b>Multiple-Choice Questions</b>                  |                        |                       |          |                                         |
|---------------------------------------------------|------------------------|-----------------------|----------|-----------------------------------------|
| Cronbach's Alpha=.767                             |                        |                       |          |                                         |
| Cronbach's Alpha Based on Standardized Items=.761 |                        |                       |          |                                         |
| N of Items=20                                     |                        |                       |          |                                         |
| <b>Exam items</b>                                 | <b>Item Statistics</b> |                       |          | <b>Item-Total Statistics</b>            |
|                                                   | <b>Mean</b>            | <b>Std. Deviation</b> | <b>N</b> | <b>Corrected Item-Total Correlation</b> |
| Exam 1 qn 1                                       | .95                    | .223                  | 326      | .071                                    |
| Exam 1 qn 2                                       | .57                    | .496                  | 326      | .317                                    |
| Exam 1 qn 3                                       | .71                    | .457                  | 326      | .273                                    |
| Exam 1 qn 4                                       | .86                    | .345                  | 326      | .199                                    |
| Exam 1 qn 5                                       | .83                    | .372                  | 326      | .216                                    |
| Exam 1 qn 6                                       | .79                    | .411                  | 326      | .003                                    |
| Exam 1 qn 7                                       | .93                    | .256                  | 326      | .210                                    |
| Exam 1 qn 8                                       | .43                    | .496                  | 326      | .122                                    |
| Exam 1 qn 9                                       | .71                    | .452                  | 326      | .330                                    |
| Exam 1 qn 10                                      | .82                    | .388                  | 326      | .308                                    |
| Exam 1 qn 11                                      | .39                    | .488                  | 326      | .398                                    |
| Exam 1 qn 12                                      | .68                    | .467                  | 326      | .383                                    |
| Exam 1 qn 13                                      | .78                    | .418                  | 326      | .325                                    |
| Exam 1 qn 14                                      | .92                    | .276                  | 326      | .246                                    |
| Exam 1 qn 15                                      | .93                    | .262                  | 326      | .202                                    |
| Exam 1 qn 16                                      | .83                    | .372                  | 326      | .153                                    |
| Exam 1 qn 17                                      | .61                    | .488                  | 326      | .230                                    |
| Exam 1 qn 18                                      | .79                    | .405                  | 326      | .255                                    |
| Exam 1 qn 19                                      | .74                    | .438                  | 326      | .245                                    |
| Exam 1 qn 20                                      | .65                    | .479                  | 326      | .375                                    |
| <b>Short-Answer Questions</b>                     |                        |                       |          |                                         |
| Cronbach's Alpha=.767                             |                        |                       |          |                                         |
| Cronbach's Alpha Based on Standardized Items=.761 |                        |                       |          |                                         |
| N of Items=20                                     |                        |                       |          |                                         |
| <b>Exam items</b>                                 | <b>Item Statistics</b> |                       |          | <b>Item-Total Statistics</b>            |
|                                                   | <b>Mean</b>            | <b>Std. Deviation</b> | <b>N</b> | <b>Corrected Item-Total Correlation</b> |
| Exam 1 qn 21                                      | 3.673                  | 1.5105                | 330      | .651                                    |
| Exam 1 qn 22                                      | 3.776                  | 1.6970                | 330      | .616                                    |
| Exam 1 qn 23                                      | 4.045                  | 1.6053                | 330      | .492                                    |
| Exam 1 qn 24                                      | 3.558                  | 1.4726                | 330      | .386                                    |
| Exam 1 qn 25                                      | 3.903                  | 1.7757                | 330      | .325                                    |
| Exam 1 qn 26                                      | 2.923                  | 1.2974                | 330      | .558                                    |
| Exam 1 qn 27                                      | 4.427                  | 1.1057                | 330      | .484                                    |
| Exam 1 qn 28                                      | 3.212                  | 1.8278                | 330      | .587                                    |

Table 4 Reliability test results for Exam 2

| <b>Multiple-Choice Questions</b>                  |                        |                       |          |                                         |
|---------------------------------------------------|------------------------|-----------------------|----------|-----------------------------------------|
| Cronbach's Alpha=.820                             |                        |                       |          |                                         |
| Cronbach's Alpha Based on Standardized Items=.819 |                        |                       |          |                                         |
| N of Items=25                                     |                        |                       |          |                                         |
| <b>Exam items</b>                                 | <b>Item Statistics</b> |                       |          | <b>Item-Total Statistics</b>            |
|                                                   | <b>Mean</b>            | <b>Std. Deviation</b> | <b>N</b> | <b>Corrected Item-Total Correlation</b> |
| Exam2 qn1                                         | .68                    | .466                  | 315      | .389                                    |
| Exam2 qn2                                         | .65                    | .476                  | 315      | .317                                    |
| Exam2 qn3                                         | .47                    | .500                  | 315      | .453                                    |
| Exam2 qn4                                         | .49                    | .501                  | 315      | .312                                    |
| Exam2 qn5                                         | .29                    | .452                  | 315      | .346                                    |
| Exam2 qn6                                         | .58                    | .494                  | 315      | .406                                    |
| Exam2 qn7                                         | .56                    | .497                  | 315      | .260                                    |
| Exam2 qn8                                         | .71                    | .454                  | 315      | .465                                    |
| Exam2 qn9                                         | .81                    | .391                  | 315      | .354                                    |
| Exam2 qn10                                        | .71                    | .455                  | 315      | .365                                    |
| Exam2 qn11                                        | .54                    | .499                  | 315      | .389                                    |
| Exam2 qn12                                        | .76                    | .429                  | 315      | .317                                    |
| Exam2 qn13                                        | .85                    | .357                  | 315      | .453                                    |
| Exam2 qn14                                        | .65                    | .478                  | 315      | .312                                    |
| Exam2 qn15                                        | .60                    | .491                  | 315      | .346                                    |
| Exam2 qn16                                        | .61                    | .489                  | 315      | .406                                    |
| Exam2 qn17                                        | .92                    | .271                  | 315      | .260                                    |
| Exam2 qn18                                        | .73                    | .445                  | 315      | .465                                    |
| Exam2 qn19                                        | .41                    | .493                  | 315      | .354                                    |
| Exam2 qn20                                        | .59                    | .492                  | 315      | .365                                    |
| Exam2 qn21                                        | .41                    | .492                  | 315      | .389                                    |
| Exam2 qn22                                        | .41                    | .492                  | 315      | .317                                    |
| Exam2 qn23                                        | .89                    | .319                  | 315      | .453                                    |
| Exam2 qn24                                        | .74                    | .441                  | 315      | .312                                    |
| Exam2 qn25                                        | .48                    | .500                  | 315      | .346                                    |
| <b>Short-Answer Questions</b>                     |                        |                       |          |                                         |
| Cronbach's Alpha=.769                             |                        |                       |          |                                         |
| Cronbach's Alpha Based on Standardized Items=.812 |                        |                       |          |                                         |
| N of Items=6                                      |                        |                       |          |                                         |
| <b>Exam items</b>                                 | <b>Item Statistics</b> |                       |          | <b>Item-Total Statistics</b>            |
|                                                   | <b>Mean</b>            | <b>Std. Deviation</b> | <b>N</b> | <b>Corrected Item-Total Correlation</b> |
| Exam2 qn26                                        | 4.0136                 | 1.72560               | 295      | .370                                    |
| Exam2 qn27                                        | 1.5492                 | 1.28791               | 295      | .602                                    |
| Exam2 qn28                                        | 3.7763                 | 2.42663               | 295      | .632                                    |
| Exam2 qn29                                        | 1.1788                 | .87653                | 295      | .577                                    |
| Exam2 qn30                                        | .8178                  | 1.02978               | 295      | .634                                    |
| Exam2 qn31                                        | 1.9975                 | 1.35753               | 295      | .579                                    |



Table 5 Reliability test results for Exam 3

| <b>Multiple-Choice Questions</b>                  |                        |                       |          |                                         |
|---------------------------------------------------|------------------------|-----------------------|----------|-----------------------------------------|
| Cronbach's Alpha=.769                             |                        |                       |          |                                         |
| Cronbach's Alpha Based on Standardized Items=.769 |                        |                       |          |                                         |
| N of Items=15                                     |                        |                       |          |                                         |
| <b>Exam items</b>                                 | <b>Item Statistics</b> |                       |          | <b>Item-Total Statistics</b>            |
|                                                   | <b>Mean</b>            | <b>Std. Deviation</b> | <b>N</b> | <b>Corrected Item-Total Correlation</b> |
| Exam 3 qn 1                                       | .57                    | .496                  | 317      | .369                                    |
| Exam 3 qn 2                                       | .45                    | .498                  | 317      | .335                                    |
| Exam 3 qn 3                                       | .40                    | .491                  | 317      | .263                                    |
| Exam 3 qn 4                                       | .37                    | .484                  | 317      | .240                                    |
| Exam 3 qn 5                                       | .59                    | .493                  | 317      | .386                                    |
| Exam 3 qn 6                                       | .39                    | .489                  | 317      | .221                                    |
| Exam 3 qn 7                                       | .64                    | .482                  | 317      | .264                                    |
| Exam 3 qn 8                                       | .47                    | .500                  | 317      | .218                                    |
| Exam 3 qn 9                                       | .72                    | .449                  | 317      | .291                                    |
| Exam 3 qn 10                                      | .40                    | .491                  | 317      | .407                                    |
| Exam 3 qn 11                                      | .24                    | .430                  | 317      | .353                                    |
| Exam 3 qn12                                       | .69                    | .462                  | 317      | .352                                    |
| Exam 3 qn 13                                      | .60                    | .491                  | 317      | .253                                    |
| Exam 3 qn 14                                      | .50                    | .501                  | 317      | .405                                    |
| Exam 3 qn 15                                      | .28                    | .449                  | 317      | .244                                    |
| <b>Short-Answer Questions</b>                     |                        |                       |          |                                         |
| Cronbach's Alpha=.782                             |                        |                       |          |                                         |
| Cronbach's Alpha Based on Standardized Items=.789 |                        |                       |          |                                         |
| N of Items=6                                      |                        |                       |          |                                         |
| <b>Exam items</b>                                 | <b>Item Statistics</b> |                       |          | <b>Item-Total Statistics</b>            |
|                                                   | <b>Mean</b>            | <b>Std. Deviation</b> | <b>N</b> | <b>Corrected Item-Total Correlation</b> |
| Exam3 qn 16                                       | 1.927                  | 2.6942                | 315      | .468                                    |
| Exam3 qn17                                        | 1.590                  | 1.8344                | 315      | .574                                    |
| Exam3 qn 18                                       | 2.930                  | 2.2228                | 315      | .556                                    |
| Exam3 qn 19                                       | 2.514                  | 2.3129                | 315      | .519                                    |
| Exam3 qn 20                                       | 4.300                  | 3.3474                | 315      | .674                                    |
| Exam3 qn 21                                       | 2.841                  | 2.2092                | 315      | .467                                    |

Table 6 Reliability test results for the Final Exam

| <b>Multiple-Choice Questions</b>                  |                        |                       |          |                                         |
|---------------------------------------------------|------------------------|-----------------------|----------|-----------------------------------------|
| Cronbach's Alpha=.784                             |                        |                       |          |                                         |
| Cronbach's Alpha Based on Standardized Items=.716 |                        |                       |          |                                         |
| N of Items=30                                     |                        |                       |          |                                         |
| <b>Exam items</b>                                 | <b>Item Statistics</b> |                       |          | <b>Item-Total Statistics</b>            |
|                                                   | <b>Mean</b>            | <b>Std. Deviation</b> | <b>N</b> | <b>Corrected Item-Total Correlation</b> |
| Final qn1                                         | .65                    | .477                  | 308      | .116                                    |
| Final qn2                                         | .79                    | .411                  | 308      | .252                                    |
| Final qn3                                         | .76                    | .428                  | 308      | .276                                    |
| Final qn4                                         | .01                    | .113                  | 308      | -.116                                   |
| Final qn5                                         | .52                    | .501                  | 308      | .392                                    |
| Final qn6                                         | .66                    | .476                  | 308      | .321                                    |
| Final qn7                                         | .16                    | .363                  | 308      | -.049                                   |
| Final qn8                                         | .56                    | .498                  | 308      | .552                                    |
| Final qn9                                         | .49                    | .501                  | 308      | .417                                    |
| Final qn10                                        | .44                    | .497                  | 308      | .244                                    |
| Final qn11                                        | .57                    | .496                  | 308      | .287                                    |
| Final qn12                                        | .42                    | .494                  | 308      | .244                                    |
| Final qn13                                        | .64                    | .480                  | 308      | .134                                    |
| Final qn14                                        | .48                    | .500                  | 308      | .321                                    |
| Final qn15                                        | .18                    | .384                  | 308      | .311                                    |
| Final qn16                                        | .24                    | .430                  | 308      | .331                                    |
| Final qn17                                        | .75                    | .432                  | 308      | .049                                    |
| Final qn18                                        | .57                    | .496                  | 308      | .370                                    |
| Final qn19                                        | .82                    | .386                  | 308      | .402                                    |
| Final qn20                                        | .22                    | .415                  | 308      | .308                                    |
| Final qn21                                        | .40                    | .491                  | 308      | .280                                    |
| Final qn22                                        | .08                    | .274                  | 308      | -.138                                   |
| Final qn23                                        | .42                    | .495                  | 308      | .258                                    |
| Final qn24                                        | .43                    | .496                  | 308      | .290                                    |
| Final qn25                                        | .21                    | .406                  | 308      | .244                                    |
| Final qn26                                        | .71                    | .456                  | 308      | .385                                    |
| Final qn27                                        | .38                    | .486                  | 308      | .032                                    |
| Final qn28                                        | .60                    | .490                  | 308      | .359                                    |
| Final qn29                                        | .36                    | .481                  | 308      | .315                                    |
| Final qn30                                        | .77                    | .422                  | 308      | .311                                    |
| <b>Short-Answer Questions</b>                     |                        |                       |          |                                         |
| Cronbach's Alpha=.823                             |                        |                       |          |                                         |
| Cronbach's Alpha Based on Standardized Items=.827 |                        |                       |          |                                         |
| N of Items=4                                      |                        |                       |          |                                         |
| <b>Exam items</b>                                 | <b>Item Statistics</b> |                       |          | <b>Item-Total Statistics</b>            |
|                                                   | <b>Mean</b>            | <b>Std. Deviation</b> | <b>N</b> | <b>Corrected Item-Total Correlation</b> |
| Final qn31                                        | 2.6076                 | 2.13426               | 316      | .670                                    |
| Final qn 32                                       | 3.1155                 | 2.28628               | 316      | .666                                    |
| Final qn 33                                       | 3.3244                 | 2.14439               | 316      | .721                                    |
| Final qn 34                                       | 3.2666                 | 2.46055               | 316      | .546                                    |

Table 7 Results of multivariate tests (Multivariate Analysis of Covariance—MANCOVA)

| <b>Between-Subjects Factors</b>                     |                             | <b>N</b>            |           |                 |             |                              |
|-----------------------------------------------------|-----------------------------|---------------------|-----------|-----------------|-------------|------------------------------|
| FA type                                             | Control group               | 173                 |           |                 |             |                              |
|                                                     | Treatment group             | 100                 |           |                 |             |                              |
| Gender                                              | Male                        | 94                  |           |                 |             |                              |
|                                                     | Female                      | 174                 |           |                 |             |                              |
| Race/ ethnicity                                     | Majority                    | 194                 |           |                 |             |                              |
|                                                     | Minority                    | 79                  |           |                 |             |                              |
| First Gen                                           | Non-first-generation status | 242                 |           |                 |             |                              |
|                                                     | First-generation status     | 31                  |           |                 |             |                              |
| <b>Multivariate Tests<sup>a</sup></b>               |                             |                     |           |                 |             |                              |
| <b>Effect</b>                                       | <b>Wilks' Lambda</b>        | <b>F</b>            | <b>df</b> | <b>Error df</b> | <b>Sig.</b> | <b><math>\eta_p^2</math></b> |
| Intercept                                           | .653                        | 33.656 <sup>b</sup> | 4.000     | 253.000         | .000        | .347                         |
| ACT Math                                            | .590                        | 44.039 <sup>b</sup> | 4.000     | 253.000         | .000        | .410                         |
| FA type                                             | .963                        | 2.423 <sup>b</sup>  | 4.000     | 253.000         | .049**      | .037                         |
| Gender                                              | .988                        | .759 <sup>b</sup>   | 4.000     | 253.000         | .553        | .012                         |
| Race/ethnicity                                      | .991                        | .572 <sup>b</sup>   | 4.000     | 253.000         | .683        | .009                         |
| First-generation status                             | .991                        | .560 <sup>b</sup>   | 4.000     | 253.000         | .692        | .009                         |
| FA type * Gender                                    | .977                        | 1.512 <sup>b</sup>  | 4.000     | 253.000         | .199        | .023                         |
| FA type * Race/ethnicity                            | .967                        | 2.170 <sup>b</sup>  | 4.000     | 253.000         | .073        | .033                         |
| FA type * First-generation status                   | .980                        | 1.324 <sup>b</sup>  | 4.000     | 253.000         | .262        | .020                         |
| Gender* Race/ethnicity                              | .995                        | .305 <sup>b</sup>   | 4.000     | 253.000         | .874        | .005                         |
| Gender * First-generation status                    | .986                        | .926 <sup>b</sup>   | 4.000     | 253.000         | .449        | .014                         |
| Race/ethnicity* First-generation status             | .992                        | .536 <sup>b</sup>   | 4.000     | 253.000         | .709        | .008                         |
| FA type * Gender * Race/ethnicity                   | .992                        | .493 <sup>b</sup>   | 4.000     | 253.000         | .741        | .008                         |
| FA type * Gender * First-generation                 | .975                        | 1.617 <sup>b</sup>  | 4.000     | 253.000         | .170        | .025                         |
| FA type * Race/ethnicity * First-generation status  | .960                        | 2.653 <sup>b</sup>  | 4.000     | 253.000         | .034**      | .040                         |
| Gender * Race/ ethnicity* First-generation status   | .993                        | .431 <sup>b</sup>   | 4.000     | 253.000         | .786        | .007                         |
| FA type* Gender * Race/ ethnicity* First-generation | .980                        | 1.293 <sup>b</sup>  | 4.000     | 253.000         | .273        | .020                         |

Note: Bolded independent variables and \*\*indicates statistically significant interaction ( $p < .05$ ).

a. Design: Intercept + ACT Math + FA type + Gender+ Race/ ethnicity + First-generation status + FA type \* Gender+ FA type \* Race/ ethnicity+ FA type \* First-generation status + Gender\* Race/ ethnicity + Gender \* First-generation + Race/ethnicity \* First-generation status + FA type \* Gender \* Race/ethnicity+ FA type \* Gender \* First-generation status + FA type \* Race/ethnicity \* First-generation status + Gender \* Race/ethnicity\* First-generation status + FA type \* Gender \* Race/ ethnicity\* First-generation status.

b. Exact Statistic

Table 8 Descriptive statistics results showing the opportunity gap by demographics between the treatment group and the comparison group in the Midterms and the Final Exam

| Demographics               | Trt-Ctl                    | Demographic Groups         | Statistic      | Exam 1 (%)  | Exam 2 (%)  | Exam 3 (%) | Final Exam (%) |            |
|----------------------------|----------------------------|----------------------------|----------------|-------------|-------------|------------|----------------|------------|
| Race                       | Ctl                        | Majority                   | Mean           | 74.21       | 60.26       | 45.21      | 49.30          |            |
|                            |                            |                            | N              | 138         | 137         | 136        | 135            |            |
|                            |                            |                            | Std. Error     | 1.35        | 1.79        | 1.78       | 1.57           |            |
|                            |                            | Minority                   | Mean           | 67.38       | 52.66       | 39.40      | 45.21          |            |
|                            |                            |                            | N              | 70          | 71          | 68         | 67             |            |
|                            |                            |                            | Std. Error     | 1.97        | 2.32        | 2.35       | 1.90           |            |
|                            |                            | <b>Opportunity gap (%)</b> |                |             | <b>6.9</b>  | <b>7.6</b> | <b>5.8</b>     | <b>4.1</b> |
|                            |                            | Trt                        | Majority       | Mean        | 79.16       | 64.06      | 49.82          | 50.57      |
|                            |                            |                            |                | N           | 86          | 87         | 86             | 87         |
|                            | Std. Error                 |                            |                | 2.34        | 3.19        | 3.84       | 2.77           |            |
|                            | Minority                   |                            | Mean           | 75.62       | 58.30       | 46.47      | 48.16          |            |
|                            |                            |                            | N              | 29          | 29          | 29         | 29             |            |
|                            |                            |                            | Std. Error     | 2.34        | 3.19        | 3.84       | 2.77           |            |
|                            | <b>Opportunity gap (%)</b> |                            |                | <b>3.5</b>  | <b>5.8</b>  | <b>3.4</b> | <b>2.4</b>     |            |
|                            | First-gen status           | Ctl                        | Non-first gen. | Mean        | 73.75       | 59.79      | 45.53          | 49.62      |
| N                          |                            |                            |                | 188         | 189         | 185        | 183            |            |
| Std. Error                 |                            |                            |                | 1.12        | 1.50        | 1.51       | 1.33           |            |
| First gen.                 |                            |                            | Mean           | 61.17       | 47.70       | 33.19      | 41.33          |            |
|                            |                            |                            | N              | 33          | 32          | 32         | 31             |            |
|                            |                            |                            | Std. Error     | 3.13        | 3.51        | 3.14       | 3.04           |            |
| <b>Opportunity gap (%)</b> |                            |                            | <b>12.6</b>    | <b>22.1</b> | <b>12.3</b> | <b>8.3</b> |                |            |
| Trt                        |                            |                            | Non-first gen. | Mean        | 79.12       | 63.63      | 50.12          | 51.08      |
|                            |                            |                            |                | N           | 102         | 103        | 102            | 103        |
|                            |                            | Std. Error                 |                | 1.21        | 1.76        | 1.87       | 1.50           |            |
|                            |                            | First gen.                 | Mean           | 73.32       | 56.48       | 42.50      | 42.47          |            |
|                            |                            |                            | N              | 14          | 14          | 14         | 14             |            |
|                            |                            |                            | Std. Error     | 3.88        | 4.20        | 5.74       | 3.68           |            |
| <b>Opportunity gap (%)</b> |                            |                            | <b>5.8</b>     | <b>7.2</b>  | <b>7.6</b>  | <b>8.6</b> |                |            |

| Demographics | Trt-Ctl                    | Demographic Groups         | Statistic  | Exam 1 (%) | Exam 2 (%)  | Exam 3 (%)  | Final Exam (%) |             |
|--------------|----------------------------|----------------------------|------------|------------|-------------|-------------|----------------|-------------|
| Gender       | Ctl                        | Male                       | Mean       | 70.60      | 58.23       | 44.32       | 47.31          |             |
|              |                            |                            | N          | 77         | 77          | 78          | 75             |             |
|              |                            |                            | Std. Error | 1.92       | 2.45        | 2.34        | 2.20           |             |
|              |                            | Female                     | Mean       | 72.54      | 57.93       | 43.37       | 49.02          |             |
|              |                            |                            | N          | 144        | 144         | 139         | 139            |             |
|              |                            |                            | Std. Error | 1.34       | 1.72        | 1.75        | 1.48           |             |
|              | <b>Opportunity gap (%)</b> |                            |            |            | <b>1.94</b> | <b>0.3</b>  | <b>0.95</b>    | <b>1.71</b> |
|              | Trt                        | Male                       | Mean       | 79.27      | 62.73       | 49.34       | 50.64          |             |
|              |                            |                            | N          | 42         | 42          | 41          | 42             |             |
|              |                            |                            | Std. Error | 1.78       | 2.73        | 3.12        | 2.60           |             |
|              |                            | Female                     | Mean       | 77.94      | 62.80       | 49.12       | 49.72          |             |
|              |                            |                            | N          | 74         | 75          | 75          | 75             |             |
|              |                            |                            | Std. Error | 1.53       | 2.06        | 2.20        | 1.66           |             |
|              |                            | <b>Opportunity gap (%)</b> |            |            |             | <b>1.33</b> | <b>0.07</b>    | <b>0.22</b> |

Table 8—  
Continued
